# Supplementary material for: Ubiquitin-proteasomal regulation of chromatin remodeler INO80 in the nucleus accumbens mediates persistent cocaine craving
Source: PubMed Central journal article supplement — Sci Adv. 2019 Oct 9;5(10):eaay0351. doi: 10.1126/sciadv.aay0351 (PMC6785264; doi:10.1126/sciadv.aay0351), 2019-10-09
Supplement: aay0351_SM.pdf [file aay0351_SM.pdf]

## Supplementary Materials for

### **Ubiquitin-proteasomal regulation of chromatin remodeler INO80 in the nucleus accumbens mediates persistent cocaine craving**

C. T. Werner, S. Mitra, J. A. Martin, A. F. Stewart, A. E. Lepack, A. Ramakrishnan, P. H. Gobira, Z.-J. Wang, R. L. Neve, A. M. Gancarz, L. Shen, I. Maze, D. M. Dietz\*

\*Corresponding author. Email: [ddietz@buffalo.edu](mailto:ddietz@buffalo.edu)

Published 9 October 2019, *Sci. Adv.* **5**, eaay0351 (2019)  
DOI: 10.1126/sciadv.aay0351

#### **The PDF file includes:**

Fig. S1. Incubated cocaine craving during prolonged abstinence following extended-access cocaine self-administration.  
Fig. S2. Experimental timeline and tissue collection.  
Fig. S3. Custom HSV vectors made to manipulate INO80.  
Fig. S4. Cue-induced food seeking and locomotor activity following food self-administration.  
Fig. S5. Custom HSV vectors made to manipulate TRIM3.  
Fig. S6. Expression of TRIM3 and synaptic substrates during abstinence following extended-access self-administration.  
Fig. S7. Similar cocaine-seeking behavior in rats that received intra-NAc injections of HSV-TRIM3 or HSV-NLS-TRIM3.  
Fig. S8. Schematic of INO80 signaling in the NAc.  
Table S1. Primer list for qPCR.  
Table S2. Primer list for ChIP.  
Legend for data S1

#### **Other Supplementary Material for this manuscript includes the following:**

(available at [advances.sciencemag.org/cgi/content/full/5/10/eaay0351/DC1](https://advances.sciencemag.org/cgi/content/full/5/10/eaay0351/DC1))

Data S1 (Microsoft Excel format). INO80 ChIP-seq data tables.

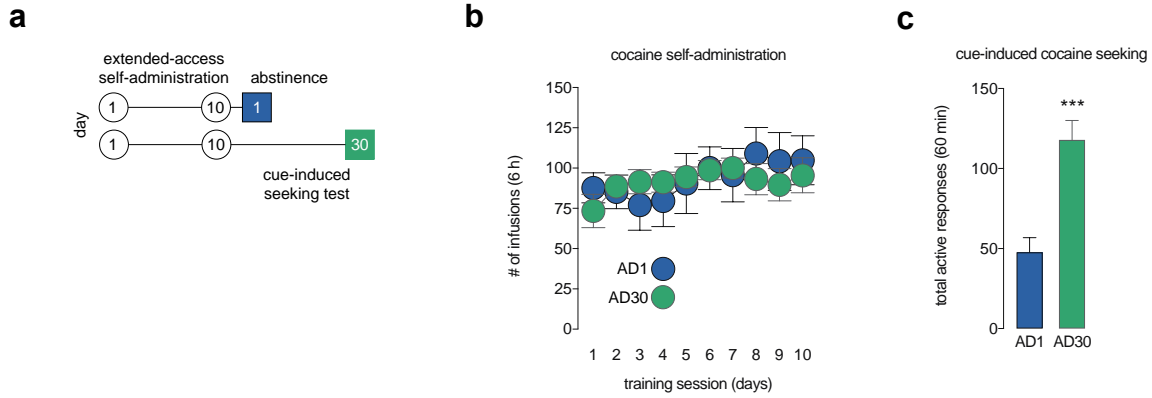

**Fig. S1. Incubated cocaine craving during prolonged abstinence following extended-access cocaine self-administration.** (A) Schematic of experimental timeline for extended-access self-administration and cue-induced seeking test. (B) Extended-access cocaine self-administration training behavior (two-way repeated measures ANOVA, treatment  $\times$  session:  $F_{(9,170)} = 0.445$ ,  $p = 0.909$ ,  $n = 9-10$  rats/group). (C) Total active responses during a cue-induced seeking test ( $t$ -test,  $t_{(17)} = 4.496$ ,  $p = 0.0003$ ;  $n = 9-10$  rats/group). Data are mean  $\pm$  sem. \*\*\* $p < 0.001$ . AD: abstinence day.

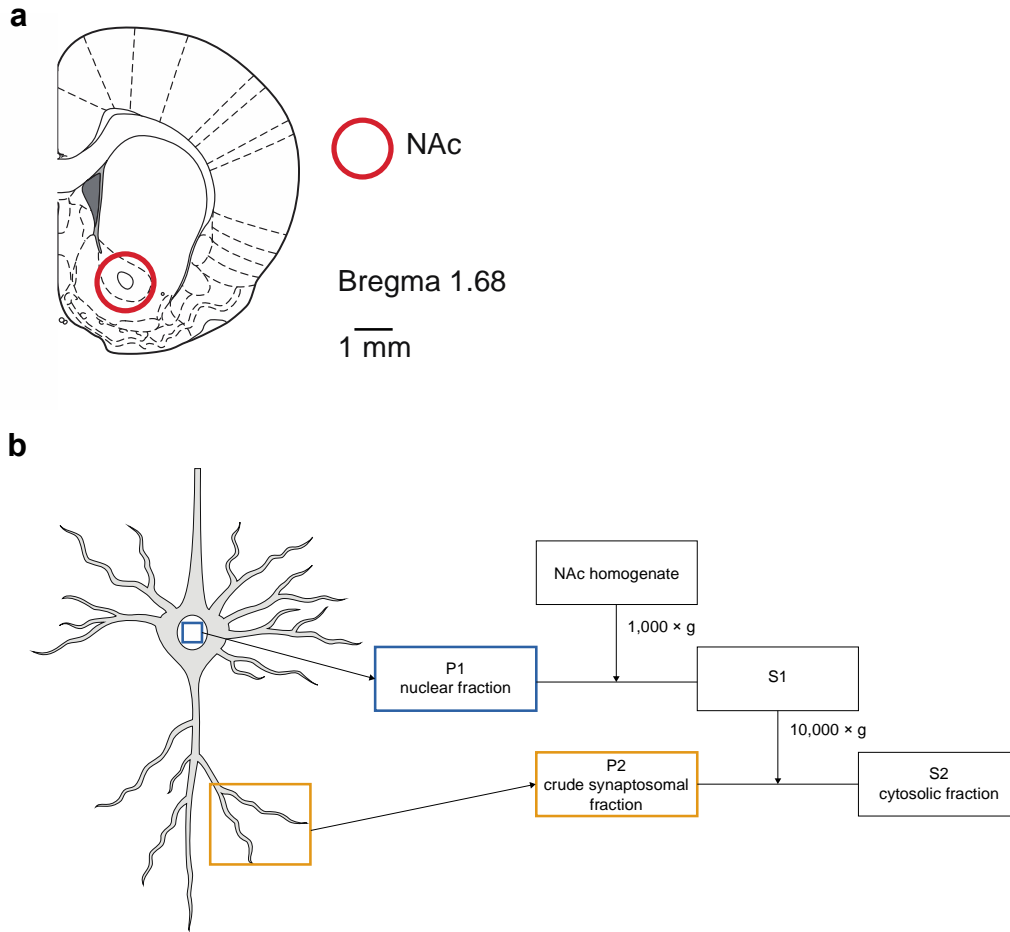

**Fig. S2. Experimental timeline and tissue collection.** (A) Schematic of dissected 2-mm-diameter nucleus accumbens (NAc) punches (red) from 1 mm coronal slice prepared with a brain matrix for immunoblotting, ChIP-seq, qPCR and qChIP studies. (B) schematic of NAc tissue processing to obtain nuclear, cytosolic and synaptosomal fractions.

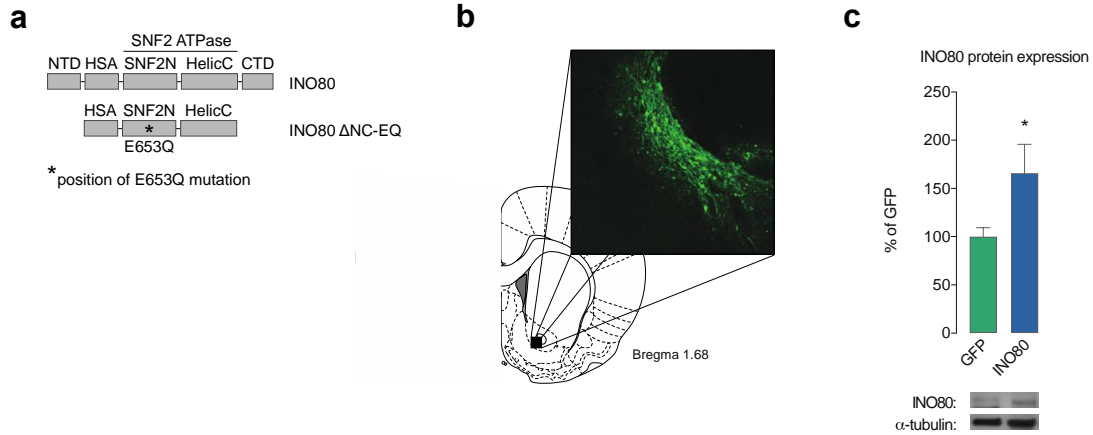

**Fig. S3. Custom HSV vectors made to manipulate INO80.** (A) Schematics depicting custom HSV vectors for INO80 and INO80 ΔNC-EQ. (B) Anatomical placement of viral infection and representative image of HSV-infected area in the NAc adjacent to the anterior commissure. (C) INO80 protein expression in NAc tissue infected with HSV-INO80 ( $t_{(9)} = 2.255$ ,  $p = 0.025$ ;  $n = 5-6$  rats/group). Data are mean  $\pm$  sem. \* $p < 0.05$ . HSV: herpes-simplex virus.

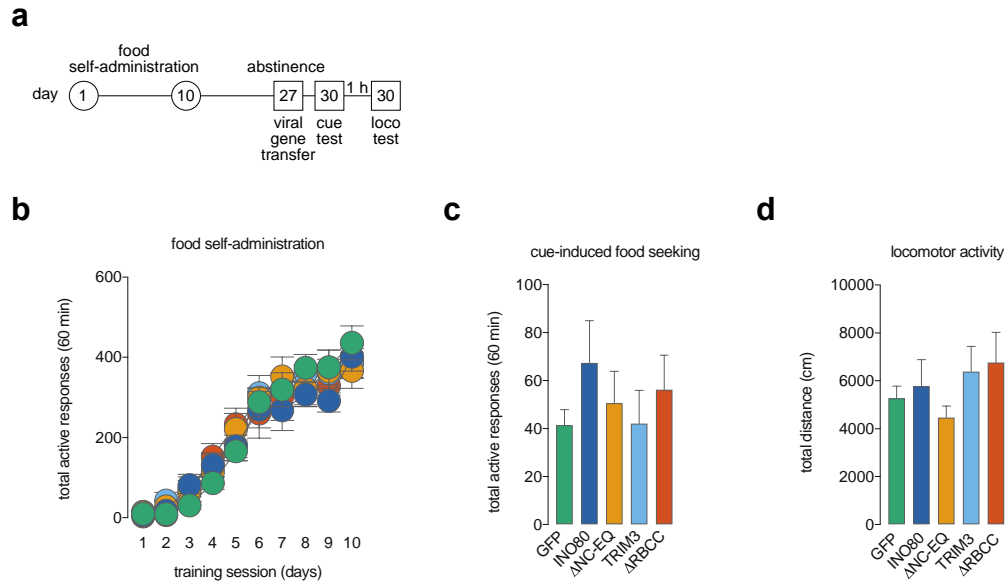

**Fig. S4. Cue-induced food seeking and locomotor activity following food self-**

**administration.** (A) Schematic of experimental timeline for food self-administration, viral-mediated gene transfer and cue-induced seeking test. (B) Self-administration training behavior prior to viral-mediated gene transfer (two-way repeated measures ANOVA, treatment group  $F_{(4,410)} = 0.566$ ,  $p = 0.688$ ;  $n = 7-16$  rats/group). (C) Total active responses during a 1 h cue-induced seeking test on “AD30” (one-way ANOVA, treatment group  $F_{(4,41)} = 0.816$ ,  $p = 0.522$ ;  $n = 7-16$  rats/group). (D) Total distance traveled in a locomotor test (one-way ANOVA, treatment group  $F_{(4,41)} = 0.95$ ,  $p = 0.445$ ;  $n = 7-16$  rats/group). Data are mean  $\pm$  sem.  $\Delta$ NC-EQ: catalytically inactive mutant INO80;  $\Delta$ RBCC: catalytically inactive mutant TRIM3.

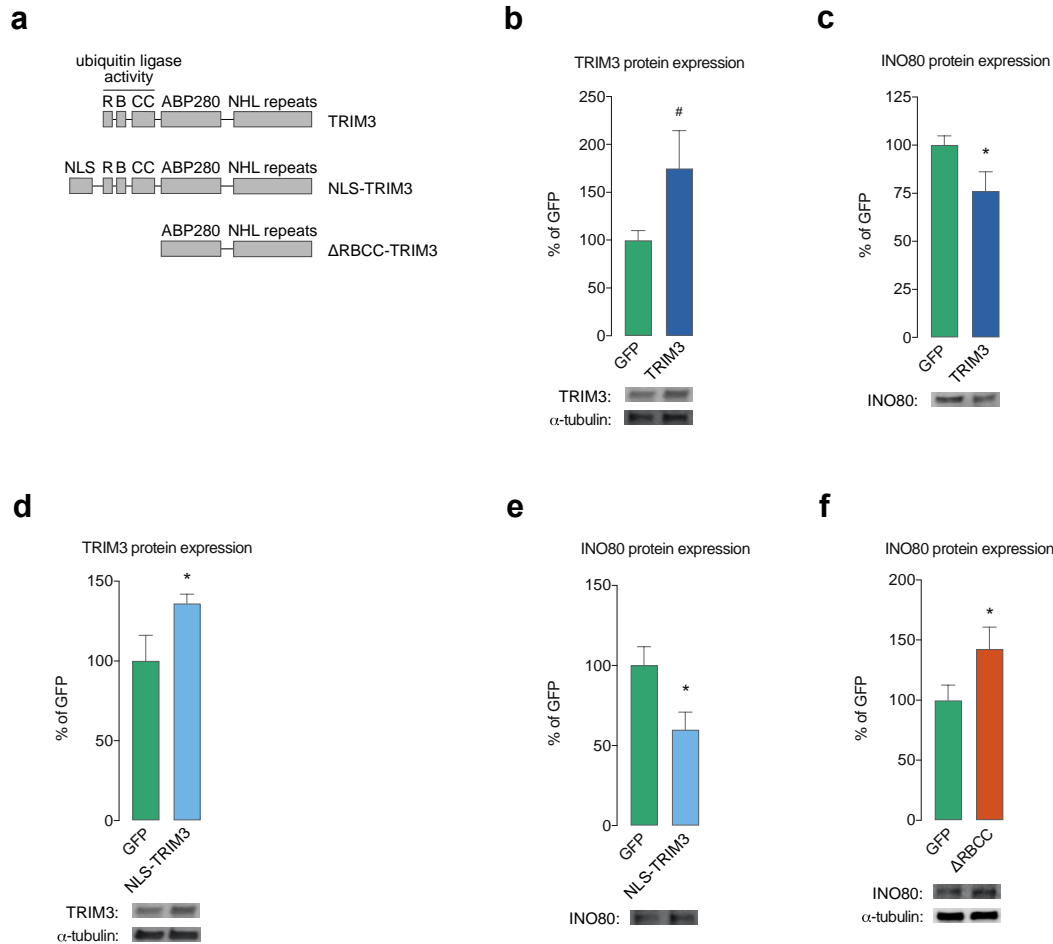

**Fig. S5. Custom HSV vectors made to manipulate TRIM3.** (A) Schematics depicting custom HSV vectors for TRIM3, NLS-TRIM3 and  $\Delta$ RBCC-TRIM3. (B, C) TRIM and INO80 protein expression in NAc tissue infected with HSV-TRIM3 (TRIM3:  $t$ -test,  $t_{(8)} = 1.815$ ,  $p = 0.054$ ; INO80:  $t$ -test,  $t_{(7)} = 2.289$ ,  $p = 0.028$ ;  $n = 4$ -5 rats/group). (D, E) TRIM and INO80 protein expression in NAc tissue infected with HSV-NLS-TRIM3 (TRIM3:  $t$ -test,  $t_{(7)} = 1.904$ ,  $p = 0.049$ ; INO80:  $t$ -test,  $t_{(9)} = 2.497$ ,  $p = 0.017$ ;  $n = 4$ -6 rats/group). (F) INO80 protein expression in NAc tissue infected with HSV- $\Delta$ RBCC-TRIM3 ( $t_{(8)} = 1.905$ ,  $p = 0.047$ ;  $n = 5$  rats/group). Data are mean  $\pm$  sem. \* $p < 0.05$ , # $p = 0.05$ . HSV: herpes-simplex virus;  $\Delta$ RBCC: ring-binding coiled coil; NLS: nuclear localizing signal.

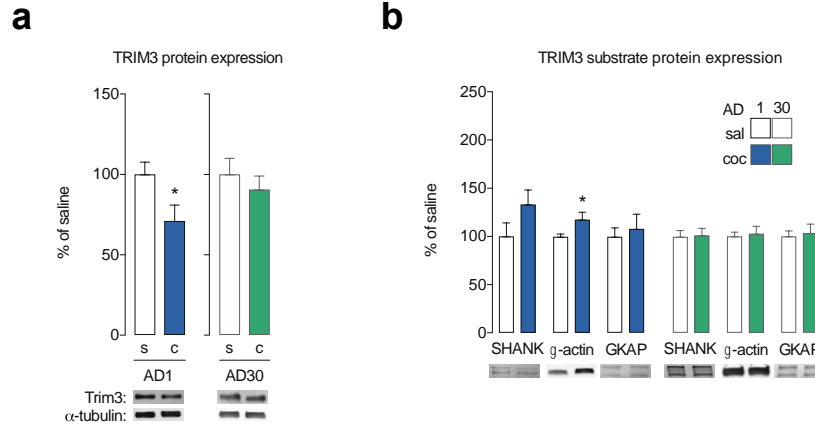

**Fig. S6. Expression of TRIM3 and synaptic substrates during abstinence following extended-access self-administration.** (A) TRIM3 protein expression in NAc P2 fractions (AD1:  $t$ -test,  $t_{(14)} = 2.35$ ,  $p = 0.034$ ; AD30:  $t$ -test,  $t_{(18)} = 0.706$ ,  $p = 0.489$ ;  $n = 7$ -10 rats/group). (B) SHANK,  $\gamma$ -actin and GKAP protein expression in NAc P2 fractions on AD1 and AD30 (SHANK AD1:  $t$ -test,  $t_{(15)} = 1.592$ ,  $p = 0.066$ ;  $\gamma$ -actin AD1:  $t$ -test,  $t_{(13)} = 2.288$ ,  $p = 0.02$ ; GKAP AD1:  $t$ -test,  $t_{(16)} = 0.225$ ,  $p = 0.825$ ; SHANK AD30:  $t$ -test,  $t_{(17)} = 0.111$ ,  $p = 0.913$ ;  $n = 9$ -10;  $\gamma$ -actin AD30:  $t$ -test,  $t_{(18)} = 0.321$ ,  $p = 0.752$ ; GKAP AD30:  $t$ -test,  $t_{(18)} = 0.317$ ,  $p = 0.755$ ;  $n = 7$ -10 rats/group). Data are mean  $\pm$  sem. \* $p < 0.05$ . AD: abstinence day; P2: crude synaptosomal fraction.

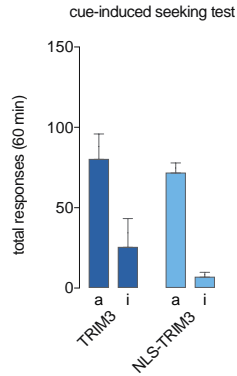

**Fig. S7. Similar cocaine-seeking behavior in rats that received intra-NAc injections of HSV-TRIM3 or HSV-NLS-TRIM3.** Total active and inactive responses during a 60-min cue-induced seeking test on AD30 for rats that self-administered cocaine (one-way ANOVA, treatment  $F_{(1,18)} = 0.245$ ; Fisher PLSD test for total active lever: TRIM3 vs NLS-TRIM3  $p = 0.597$ ;  $n = 5-6$  rats/group) HSV: herpes-simplex virus; NLS: nuclear localizing signal.



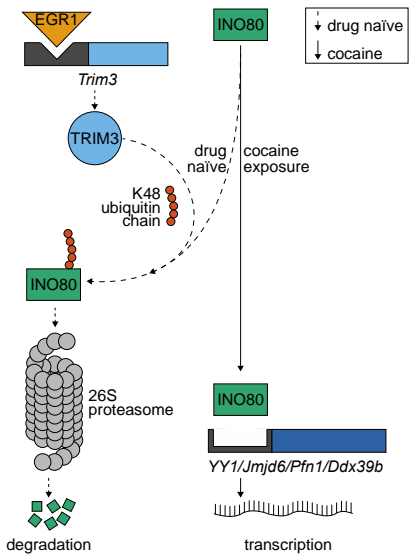

**Fig. S8. Schematic of INO80 signaling in the NAc.** Under basal conditions (drug naïve; dotted lines), Egr1 transcribes *Trim3* and TRIM3 mediates the polyubiquitination of INO80 for degradation by the 26S proteasome complex. During prolonged abstinence following cocaine exposure (solid line), there are reductions in Egr1 binding along the *Trim3* promoter, TRIM3 protein expression and TRIM3-mediated proteasomal degradation of INO80. This leads to an increase in INO80 expression that mediates cue-induced cocaine seeking and changes in INO80 binding patterns along the rat genome.

**Table S1. Primer list for qPCR.**

| <b>Gene symbol</b> | <b>Gene name</b>                            | <b>Ensembl accession no.</b> | <b>Primer sequence, 5'–3'</b> |                          |
|--------------------|---------------------------------------------|------------------------------|-------------------------------|--------------------------|
| <i>Trim3</i>       | Tripartite Motif-Containing protein 3       | ENSRNOG00000018356           | F                             | GAGCCAGCATCTTCCAAGTGTGTA |
|                    |                                             |                              | R                             | AACCCAACAAGCCCTAACAC     |
| <i>Yy1</i>         | YY1 Transcription Factor                    | ENSG00000100811              | F                             | TTTGCCAGAATGAAGCCAAGAA   |
|                    |                                             |                              | R                             | GCTCTCAACGAACGCTTTGC     |
| <i>Jmjd6</i>       | Arginine Demethylase and Lysine Hydroxylase | ENSG00000070495              | F                             | AACTGCTTTTGTACCAGGGGG    |
|                    |                                             |                              | R                             | CGCCCTCTTACCGTCTTG       |
| <i>Ddx39b</i>      | DEXD-Box Helicase 39B                       | ENSG00000198563              | F                             | AGTGCTTAGCTCTTCTGTCCGG   |
|                    |                                             |                              | R                             | GTCCACATCGTTCTCTGCCA     |

**Table S2. Primer list for ChIP.**

| <b>Gene symbol</b> | <b>Gene name</b>              | <b>Ensembl accession no.</b> | <b>Primer sequence, 5'–3'</b> |                      |
|--------------------|-------------------------------|------------------------------|-------------------------------|----------------------|
| <i>Trim3</i>       | Tripartite Motif-Containing 3 | ENSRNOT00000024850.5         | F                             | gggtctgagagatgtgggcg |

**Data S1. INO80 ChIP-seq data tables.** INO80 peaks (cocaine, saline); INO80 diffReps (cocaine vs. saline); Kegg INO80 (cocaine vs. saline)
